# Supplementary material for: ALCAM is an entry factor for severe community acquired Pneumonia-associated Human adenovirus species B
Source: PubMed Central journal article supplement — Nat Commun. 2024 Dec 30;15:10889. doi: 10.1038/s41467-024-55261-3 (PMC11686370; doi:10.1038/s41467-024-55261-3), 2024-12-30
Supplement: 41467_2024_55261_MOESM1_ESM.pdf [file 41467_2024_55261_MOESM1_ESM.pdf]

## Supplementary Information

# **ALCAM is an Entry Factor for Severe Community Acquired Pneumonia-associated Human Adenovirus Species B**

Yusang Xie<sup>1\*</sup>, Hong Mei<sup>2\*</sup>, Wei Wang<sup>2</sup>, Xiao Li<sup>3</sup>, Pengfei Hu<sup>2</sup>, Xingui Tian<sup>3</sup>, Rong Zhou<sup>3, 4</sup>, Jia Liu<sup>2, 4, 5, #</sup>, Jieming Qu<sup>1, #</sup>

<sup>1</sup>Department of Pulmonary and Critical Care Medicine, Ruijin Hospital, Institutes of Respiratory Diseases, School of Medicine, Shanghai Jiao Tong University and Shanghai Key Laboratory of Emergency Prevention, Diagnosis and Treatment of Respiratory Infectious Diseases, Shanghai 200025, China

<sup>2</sup>Shanghai Institute for Advanced Immunochemical Studies and School of Life Science and Technology, ShanghaiTech University, Shanghai 201210, P. R. China

<sup>3</sup>State Key Laboratory of Respiratory Disease, National Clinical Research Center for Respiratory Disease, Guangzhou Institute of Respiratory Health, The First Affiliated Hospital of Guangzhou Medical University, Guangzhou Medical University, Guangzhou 510182, China

<sup>4</sup>Guangzhou National Laboratory, Guangzhou International Bio Island, No. 9 XingDaoHuanBei Road, Guangzhou, 510005, Guangdong, China.

<sup>5</sup>Shanghai Clinical Research and Trial Center, Shanghai, 201210, China.

\*These authors contributed equally to this work.

Correspondence should be addressed to J.Q. (jmqu0906@163.com), J.L. (liujia@shanghaitech.edu.cn)

## Supplementary Figures

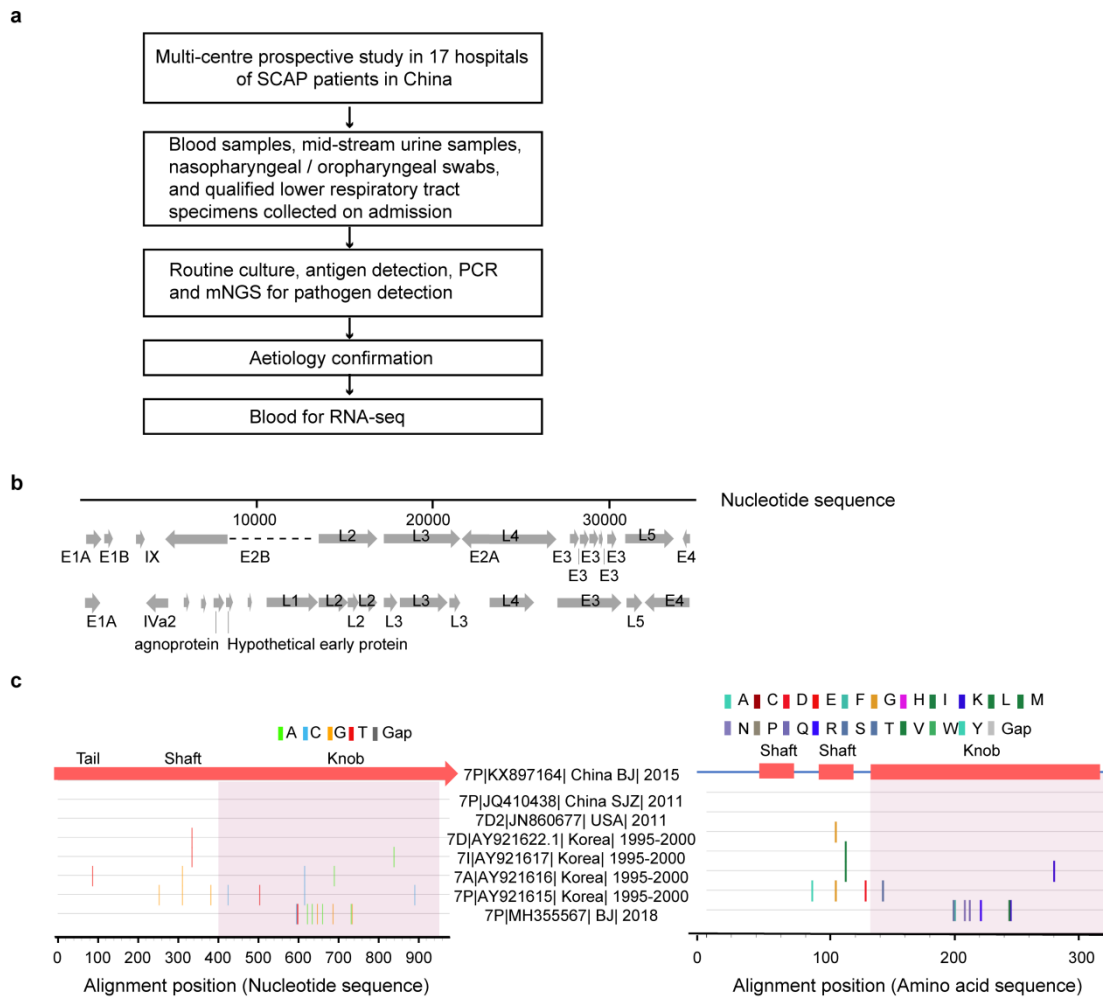

**Supplementary Figure 1 Identification of SCAP-associated HAdV-B7.** **a**, Flowchart showing the procedure of multi-centre prospective study. The data are extracted from a previous publication<sup>8</sup> and re-analyzed and the figure re-drawn. **b**, Architecture of the genomic sequence of HAdV-B7. Fiber protein is encoded by L5 gene. **c**, Nucleotide and amino acid sequence alignment of fiber proteins in publicly available HAdV-B7 sequences. The alignment results are visualized using Highlighter online tools (<https://www.hiv.lanl.gov/content/index>). Source data are provided as a Source Data file.

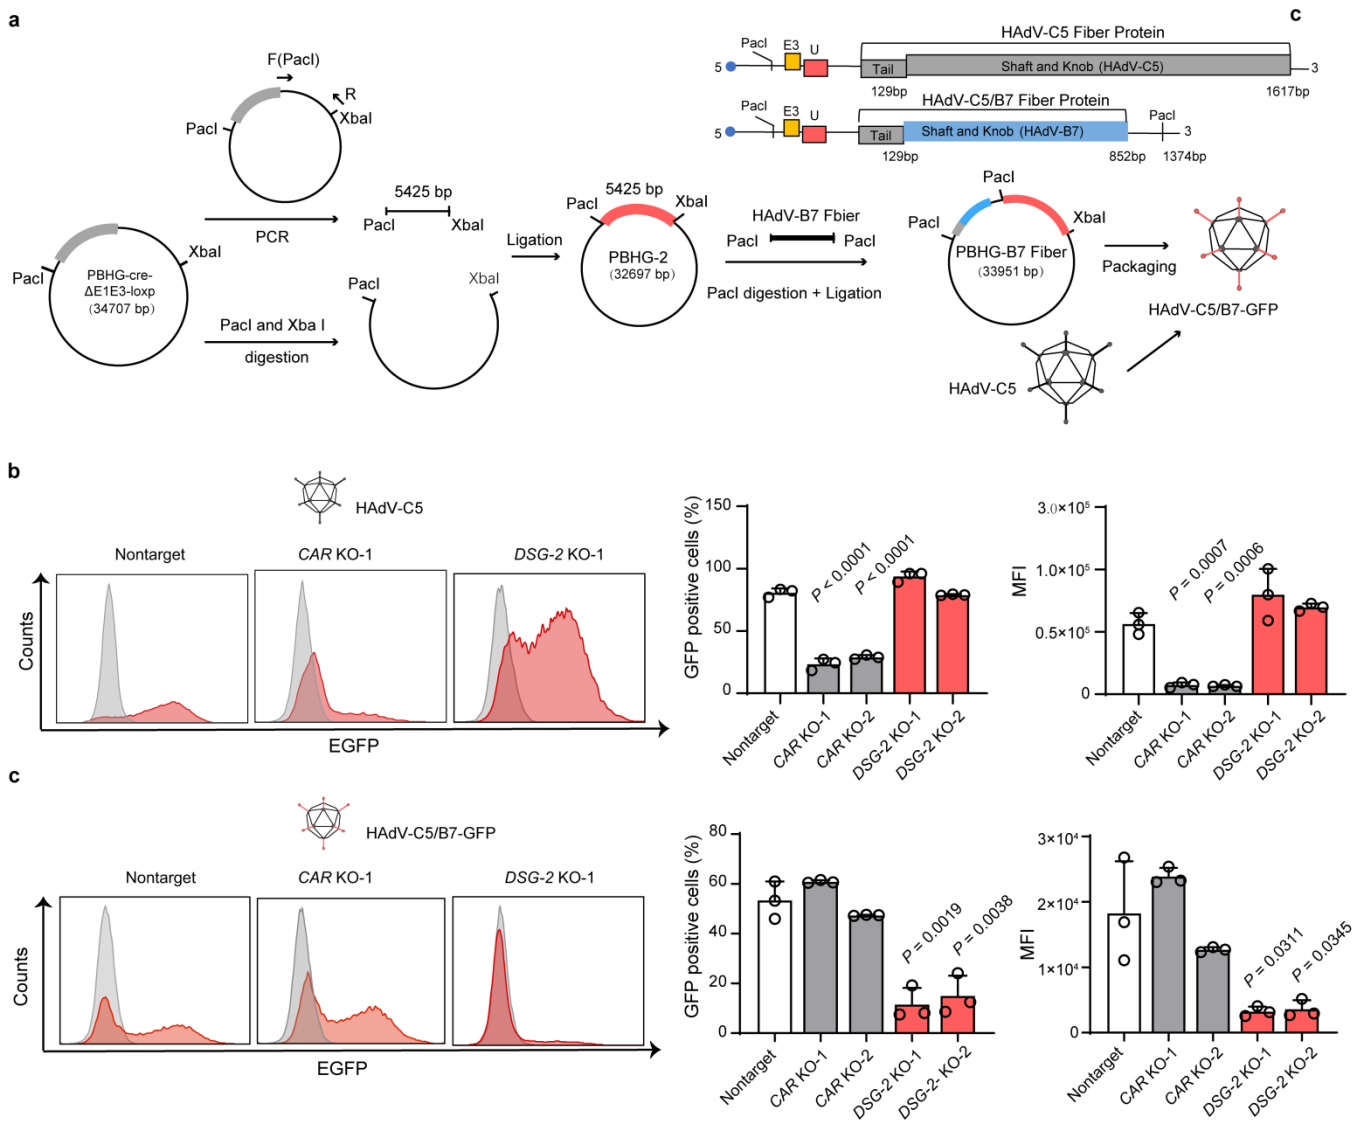

**Supplementary Figure 2 Construction and validation of recombinant HAAdV-C5/B7-GFP. a**, Flow chart showing cloning and production procedure of HAAdV-C5/B7-GFP. **b-c**, Flow cytometry analysis of the EGFP positive ratio of WT, CAR knockout and DSG-2 knockout cells at 48 h post HAAdV-C5 (**b**) or HAAdV-C5/B7 (**c**) infection. For **b-c**, data are presented as mean  $\pm$  SD ( $n = 3$ ) from three independent biological replicates. The significant difference is analyzed by two-tailed unpaired Student's  $t$  test. For **b**, the  $p$  values between GFP positive cells (%) of Nontarget and *CAR KO-1* and *CAR KO-2* are  $6e-5$  and  $1e-5$ , respectively. Source data are provided as a Source Data file.

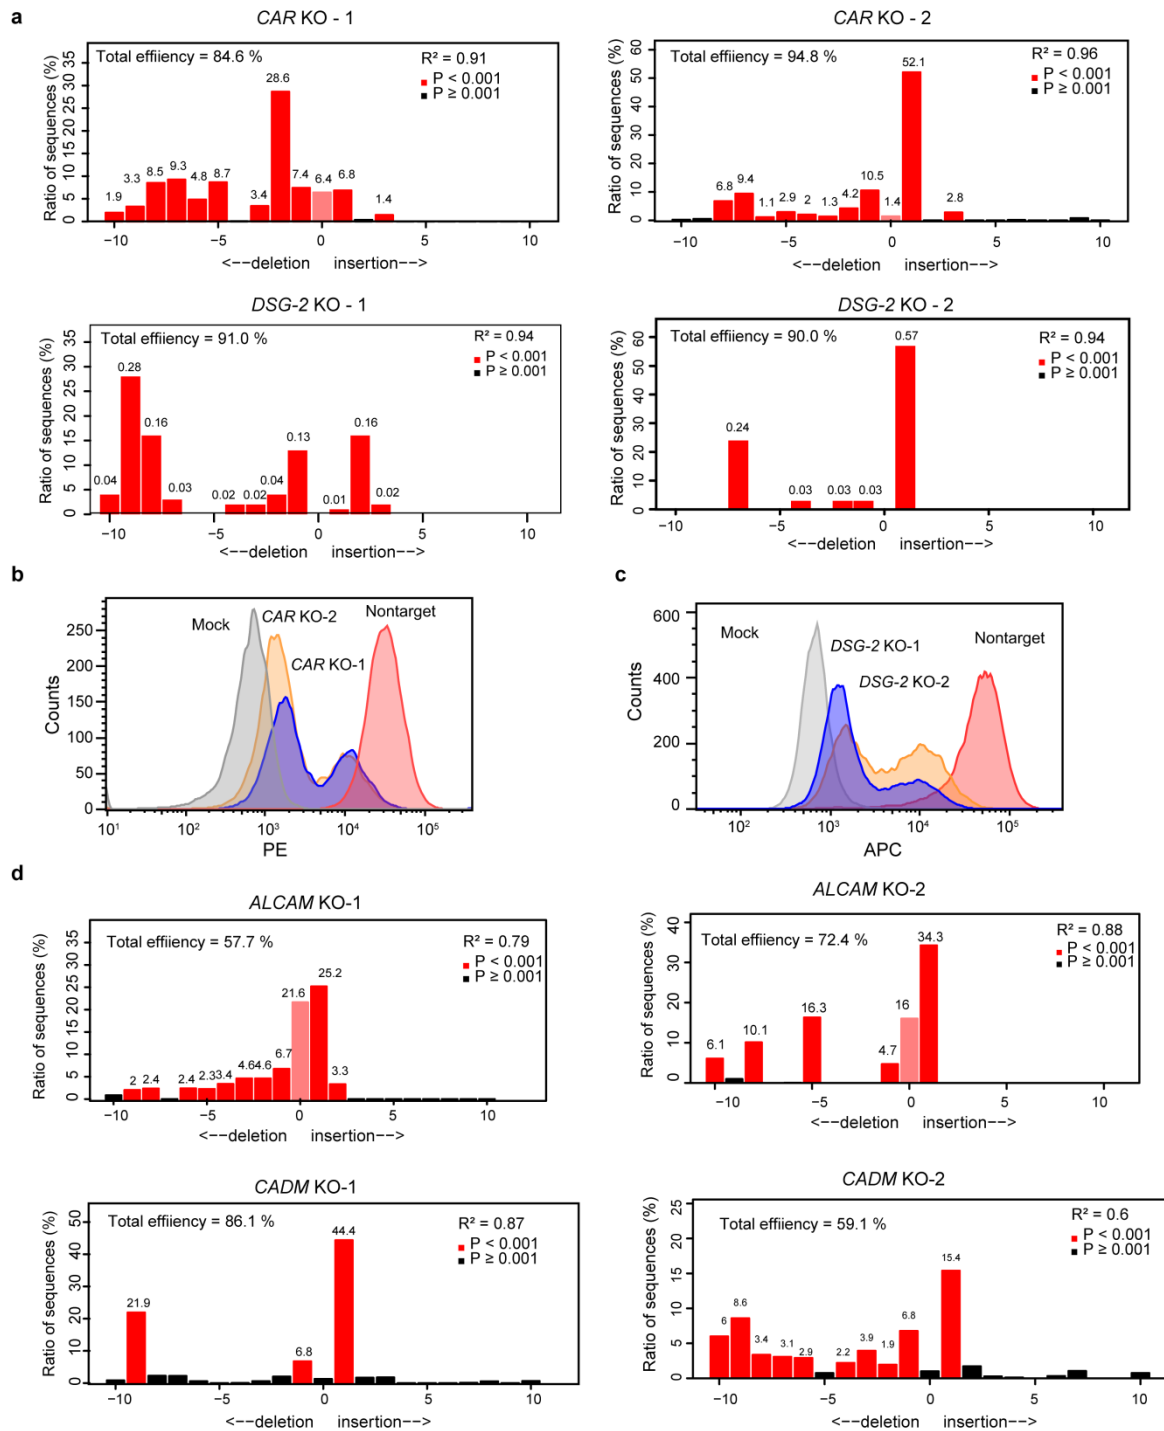

**Supplementary Figure 3 Analyses of the knockout efficiencies of CAR, DSG-2, ALCAM and CADM1 sgRNAs in HEK-293A. a**, Determination of the knockout efficiencies in CAR knockout and DSG-2 knockout cells by TIDE analysis of Sanger sequencing results. **b-c**, Flow cytometry analysis of cell surface expression of ALCAM and DSG-2 proteins in *ALCAM* knockout (**b**) and *DSG-2* knockout (**c**) cells respectively (as mixed population). Negative controls are mock staining with PBS. **d**, Evaluation of ALCAM and CADM1 knockout efficiencies, as determined by TIDE analysis of Sanger sequencing results. Source data are provided as a Source Data file.

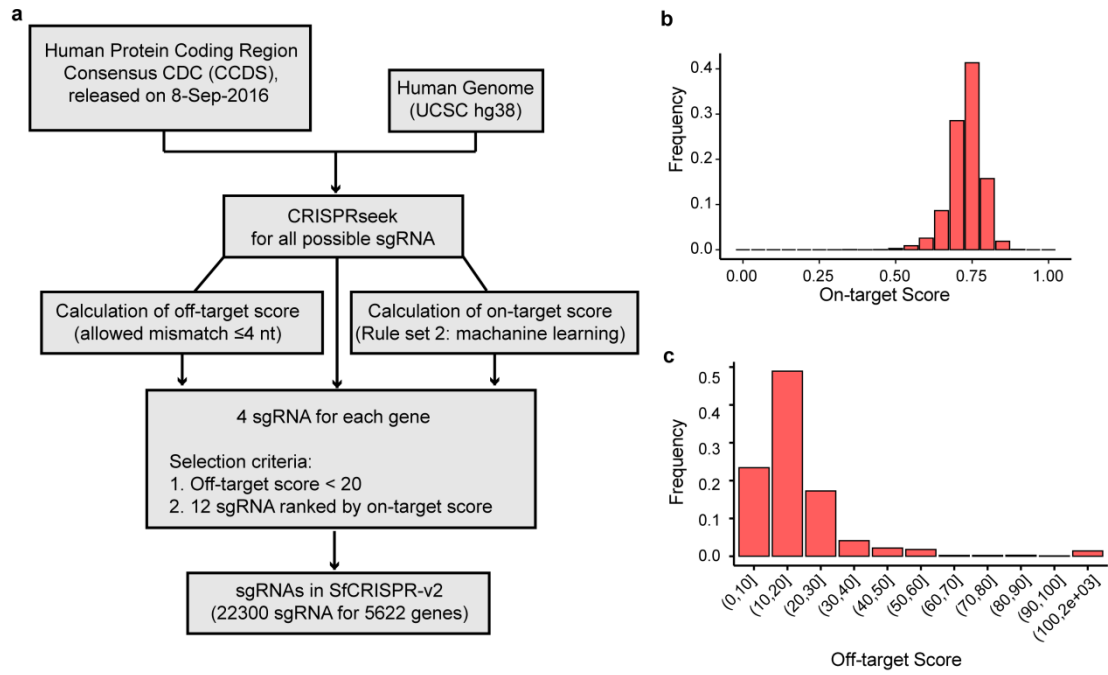

**Supplementary Figure 4 The design of sgRNAs in SfCRISPR-v2. a**, Flow chart showing the sgRNA design. **b-c**, The distribution of sgRNA on-target (**b**) and off-target (**c**) scores. Source data are provided as a Source Data file.

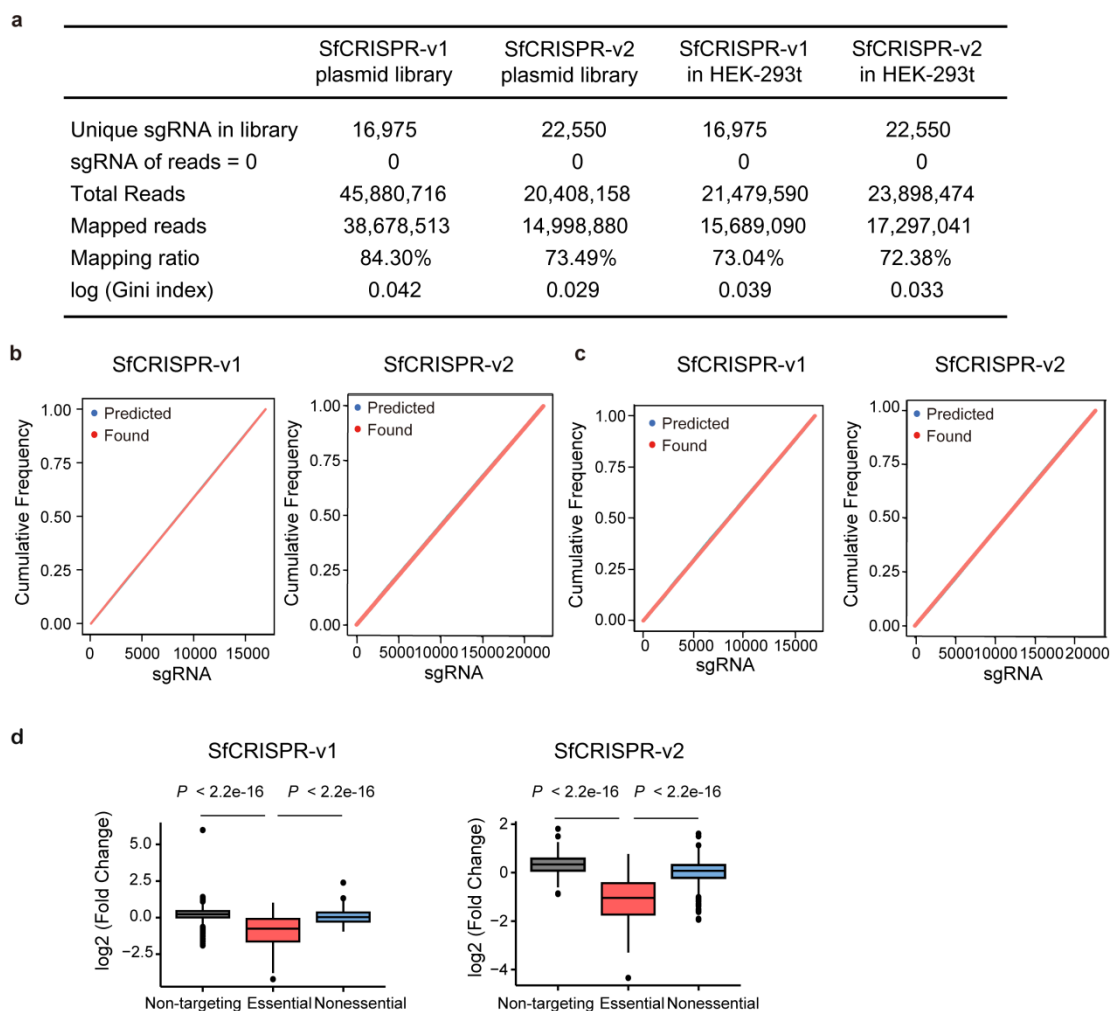

**Supplementary Figure 5 Quality validation of constructed SfCRISPR-v1 and -v2 as pooled plasmids or pooled cells.** **a**, Summary of the NGS analysis results of sgRNAs in constructed plasmid and HEK-293T cell libraries. **b-c**, Distribution of sgRNAs in SfCRISPR-v1 and -v2 plasmid (**b**) or HEK-293T cells (**c**) libraries. **d**, The fold change of non-targeting sgRNAs and sgRNAs targeting essential genes and nonessential genes in SfCRISPR-v1 and -v2 HEK-293T cell libraries. The sgRNA changes at 5 and 14 days after LV transduction are compared and shown as fold changes. The box plot illustrates the distribution of the data. The thick line within the box represents the median. The top and bottom edges of the box indicate the 25th percentile (lower quartile, Q1) and the 75th percentile (upper quartile, Q3), encompassing the interquartile range (IQR), which includes the middle 50% of the data. The vertical lines (whiskers) extend to the smallest and largest data points within  $Q1 - 1.5 * IQR$  and  $Q3 + 1.5 * IQR$ , respectively. Data points beyond this range are shown as individual dots, representing outliers. Statistical analysis is performed using Student's *t* test. Source data are provided as a Source Data file.

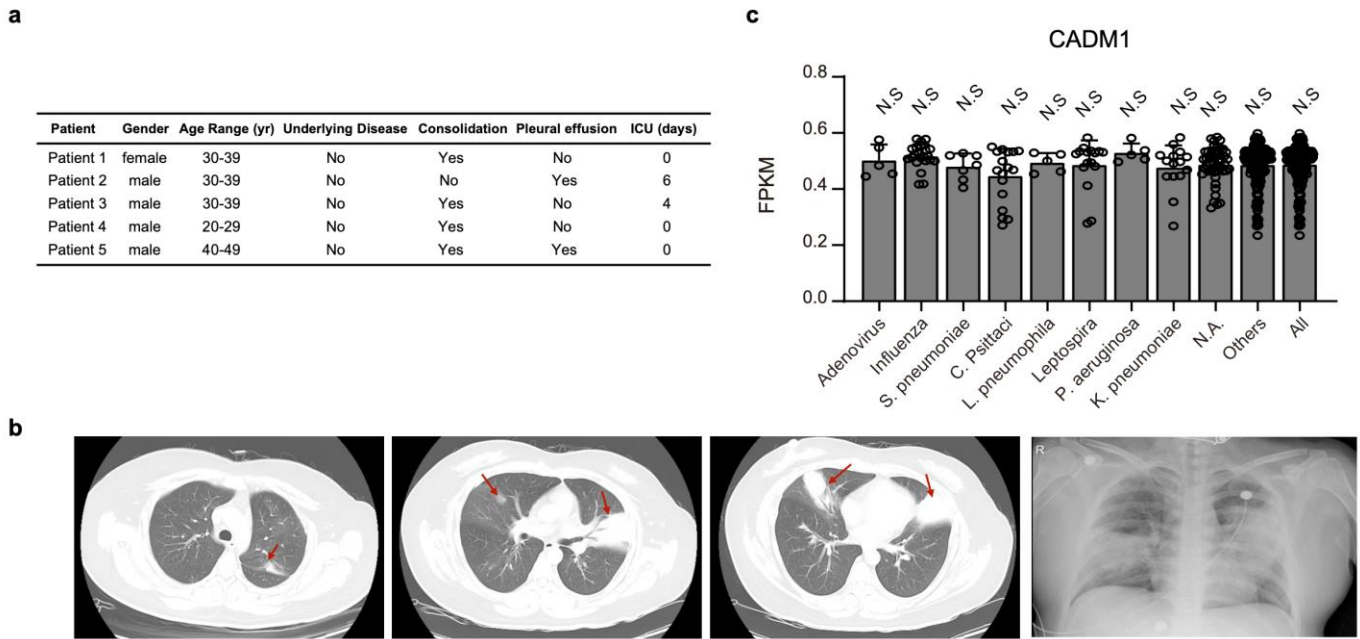

**Supplementary Figure 6 Multi-centre prospective study of SCAP patients in China.** **a**, Information of the five SCAP patients with HAdV infection. **b**, Representative axial and coronal planes of layered computer tomography images of Patient 1 on admission. The arrows dictate the consolidation in multiple lung lobes. The experiment is repeated three times independently and similar results are obtained. **c**, Analysis of CADM1 expression in blood samples from SCAP patients with different pathogen infection, as determined by RNA-Seq. All available blood samples of HAdV-infected patients (5 in total) are analyzed. N.A., no available identifiable pathogen information. Others, all pathogens excluding HAdV. All, all analyzed SCAP patients. Data are presented as mean  $\pm$  SD ( $n \geq 3$ ) from different patients. The significant difference between HAdV and other pathogen groups is analyzed by two-tailed unpaired Student's *t* test. Source data are provided as a Source Data file.

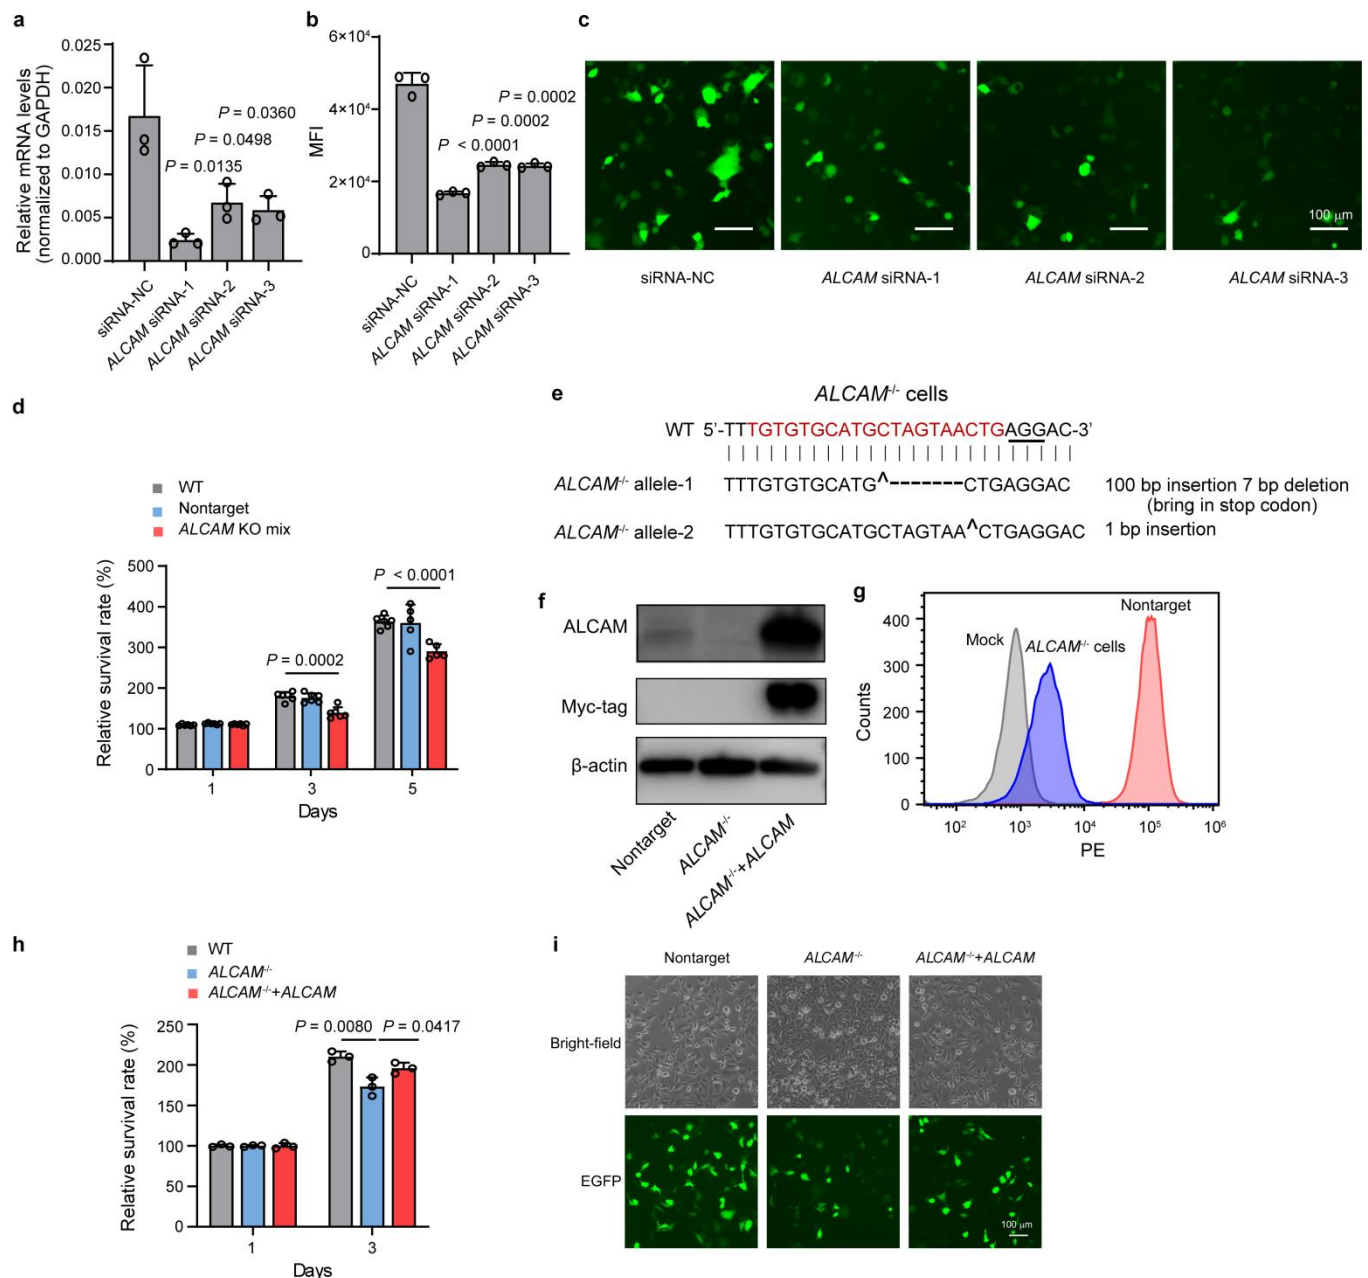

### Supplementary Figure 7 Validation of ALCAM function for HAdV-C5/B7-GFP infection in HEK-293A.

**a**, RT-qPCR quantification of ALCAM expression in ALCAM knockdown cells treated with ALCAM siRNA-1, 2 and 3. GAPDH is used as an internal control. **b-c** (related to Fig. 2), Flow cytometry analyses (**b**) and representative fluorescence images (**c**) of WT and ALCAM knockdown cells at 48 h post HAdV-C5/B7-GFP infection. MFI, mean fluorescence intensity. Scale bar, 100  $\mu$ m. **d**, Proliferation of WT, non-targeting sgRNA and ALCAM knockout HEK-293A cells at 1, 3 and 5 day post seeding, quantified by CCK-8 assay. **e-g**, Characterization of *ALCAM*<sup>-/-</sup> single clone of HEK-293A by Sanger sequencing analysis of mutated alleles (**e**), western blot analysis of total ALCAM protein (**f**) and flow cytometry analysis of cell surface ALCAM protein (**g**). For **e**, the 20-bp CRISPR-Cas9 targeting sequence is highlighted in red and protospacer adjacent motif (PAM) underlined. **h**, Proliferation of WT, *ALCAM*<sup>-/-</sup> and overexpression-rescued *ALCAM*<sup>-/-</sup> HEK-293A cells at 1, 3 and 5 days post seeding, as quantified by CCK-8 assay. **i**, Representative bright-field and fluorescence



images of WT, knockout and overexpression-rescued cells at 48 h post HAdV-C5/B7-GFP infection. Scale bar, 100  $\mu\text{m}$ . For **a-b, d and h**, data are presented as mean  $\pm$  SD ( $n \geq 3$ ) from independent biological replicates. The significant difference is analyzed by two-tailed unpaired Student's  $t$  test. For **b**, the  $p$  value between siRNA-NC and *ALCAM*-siRNA-1 is  $7e-5$ . For **d**, the  $p$  value between WT and *ALCAM* KO-mix at 1, 3 and 5 day post seeding is  $4e-5$ . Source data are provided as a Source Data file.

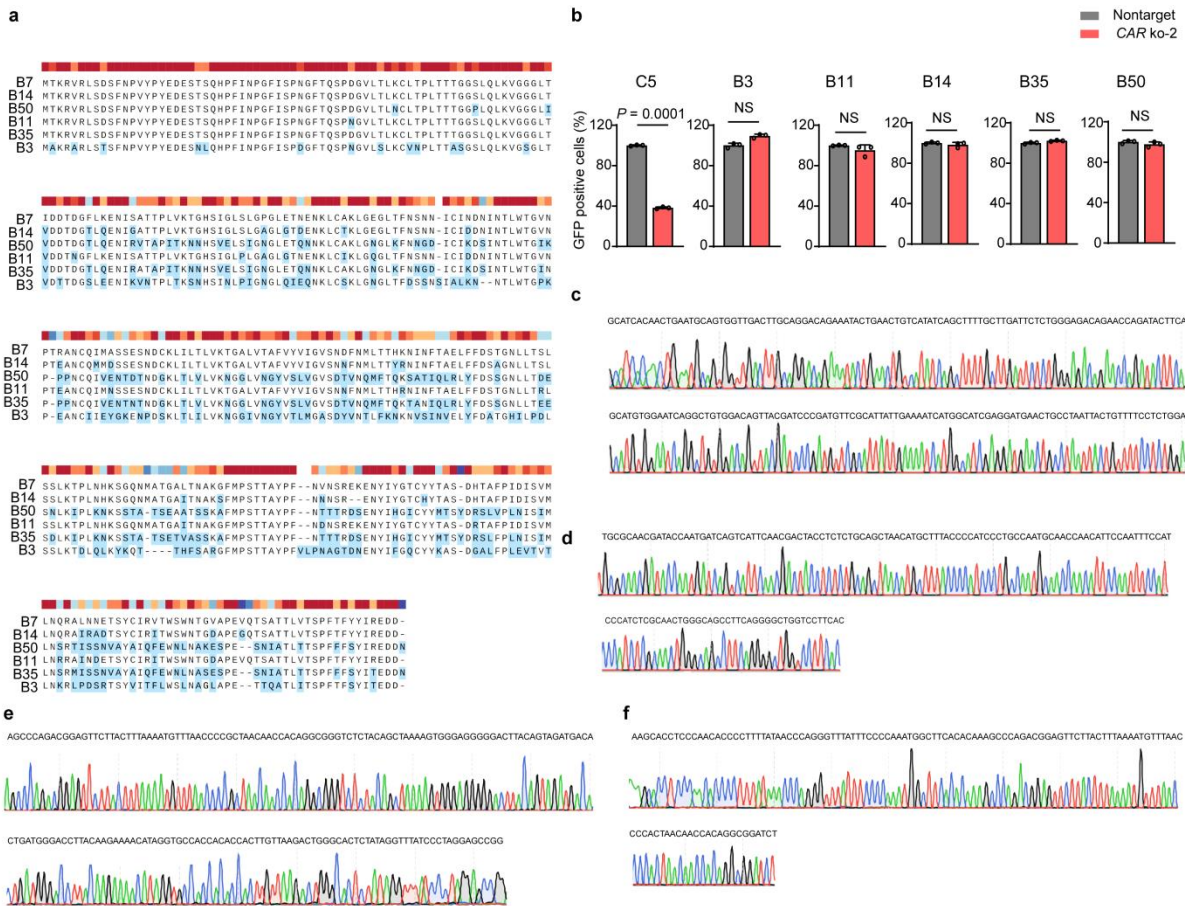

**Supplementary Figure 8. Comparison of fiber protein sequences and the infection efficiencies of chimeric HAdV-B and clinical HAdV-B3 and HAdV-B7 (related to Fig. 3).** **a**, Amino acid sequence alignment of the fiber domains of C5-based chimeric HAdV-B3, B7, B14, B35 and B50. **b**, Flow cytometry analysis of the GFP positive ratio of non-targeting and CAR knockout HEK-293T cells at 48 h post infection with HAdV-C5 or C5-based chimeric HAdV-B3, -B11, -B14, -B35 and -B50. Data are presented as mean  $\pm$  SD ( $n = 3$ ) from three independent biological replicates. The significant difference between non-targeting and knockout groups is analyzed by two-tailed unpaired Student's *t* test. **c-f**, Sanger sequencing results of the fiber sequences of clinical HAdV-B3, HAdV-B7, HAdV-B14 and HAdV-B35 used in this study for comparison with the deposited sequences in NCBI database. Source data are provided as a Source Data file.

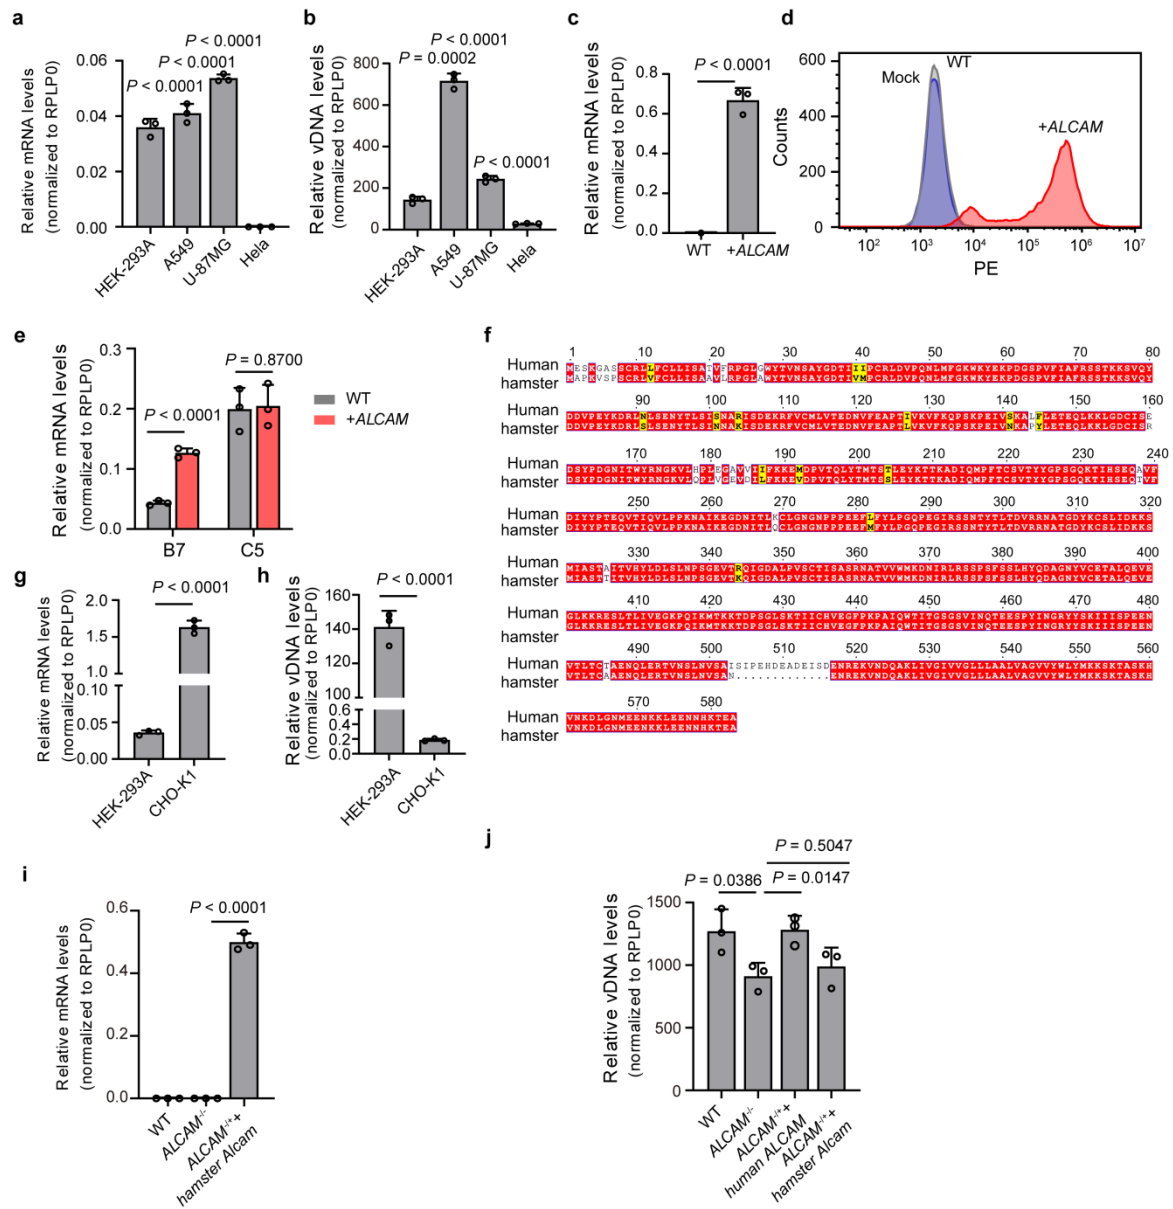

**Supplementary Figure 9 Analysis of the dependency of HAdV-B infection on ALCAM expression in multiple cell lines. (related to Fig. 3).** **a**, RT-qPCR quantification of *ALCAM* mRNA expression in multiple human cell lines. **b**, RT-qPCR quantification of viral L5 DNA in different cells at 48 h post infection with clinical HAAdV-B7. **a-b**, The significant difference between HeLa and other cells is analyzed. **c-d**, RT-qPCR (**c**) and flow cytometry (**d**) analyses of *ALCAM* mRNA and protein expression in WT and *ALCAM*-overexpressed HeLa cells. For flow cytometry analysis, cells are stained with anti-ALCAM antibody, and negative control is mock staining with PBS. **e**, The effects of *ALCAM* overexpression on HAAdV-C5/B7-GFP and HAAdV-C5-GFP infection in HeLa cells, as evaluated by RT-qPCR quantification of GFP mRNA. **f**, Protein sequence alignment of human ALCAM and CHO ALCAM, as analyzed by ClustalW. **g**, *Alcam* mRNA expression in CHO-K1, as determined by RT-qPCR. **h**, Clinical HAAdV-B7 infection in CHO-K1 and HEK-293A cells, as determined by qPCR. **i**, Hamster *Alcam* mRNA expression in WT, *ALCAM*<sup>-/-</sup> and hamster's *Alcam*-overexpressed *ALCAM*<sup>-/-</sup> HEK-293A cells, as determined by RT-qPCR. **j**, Clinical HAAdV-B7 infection in WT, *ALCAM*<sup>-/-</sup>, *ALCAM* overexpression-rescued and hamster's *Alcam*-overexpressed *ALCAM*<sup>-/-</sup> HEK-

293A cells, as determined by qPCR. For **a-c**, **e** and **g-j**, *rplp0* is used as an internal control, and data are presented as mean  $\pm$  SD ( $n = 3$ ) from three independent biological replicates, and the significant difference is analyzed by two-tailed unpaired Student's *t* test. For **a**, the *p* values between HeLa and HEK293A, A549 and U-87MG are  $3e-5$ ,  $3e-5$  and  $3e-7$ , respectively. For **b**, the *p* values between HeLa and A549 and U-87MG are  $5e-6$  and  $2e-5$ , respectively. For **c**, the *p* value is  $5e-5$ . For **e**, the *p* value between WT and ALCAM-overexpressed HeLa cells after HAdV-C5/B7-GFP infection is  $8e-5$ . For **g**, the *p* value is  $6e-6$ . For **h**, the *p* value is  $1e-5$ . For **i**, the *p* value between *ALCAM*<sup>-/-</sup> and *Alcam*-overexpressed *ALCAM*<sup>-/-</sup> cells is  $6e-6$ . Source data are provided as a Source Data file.

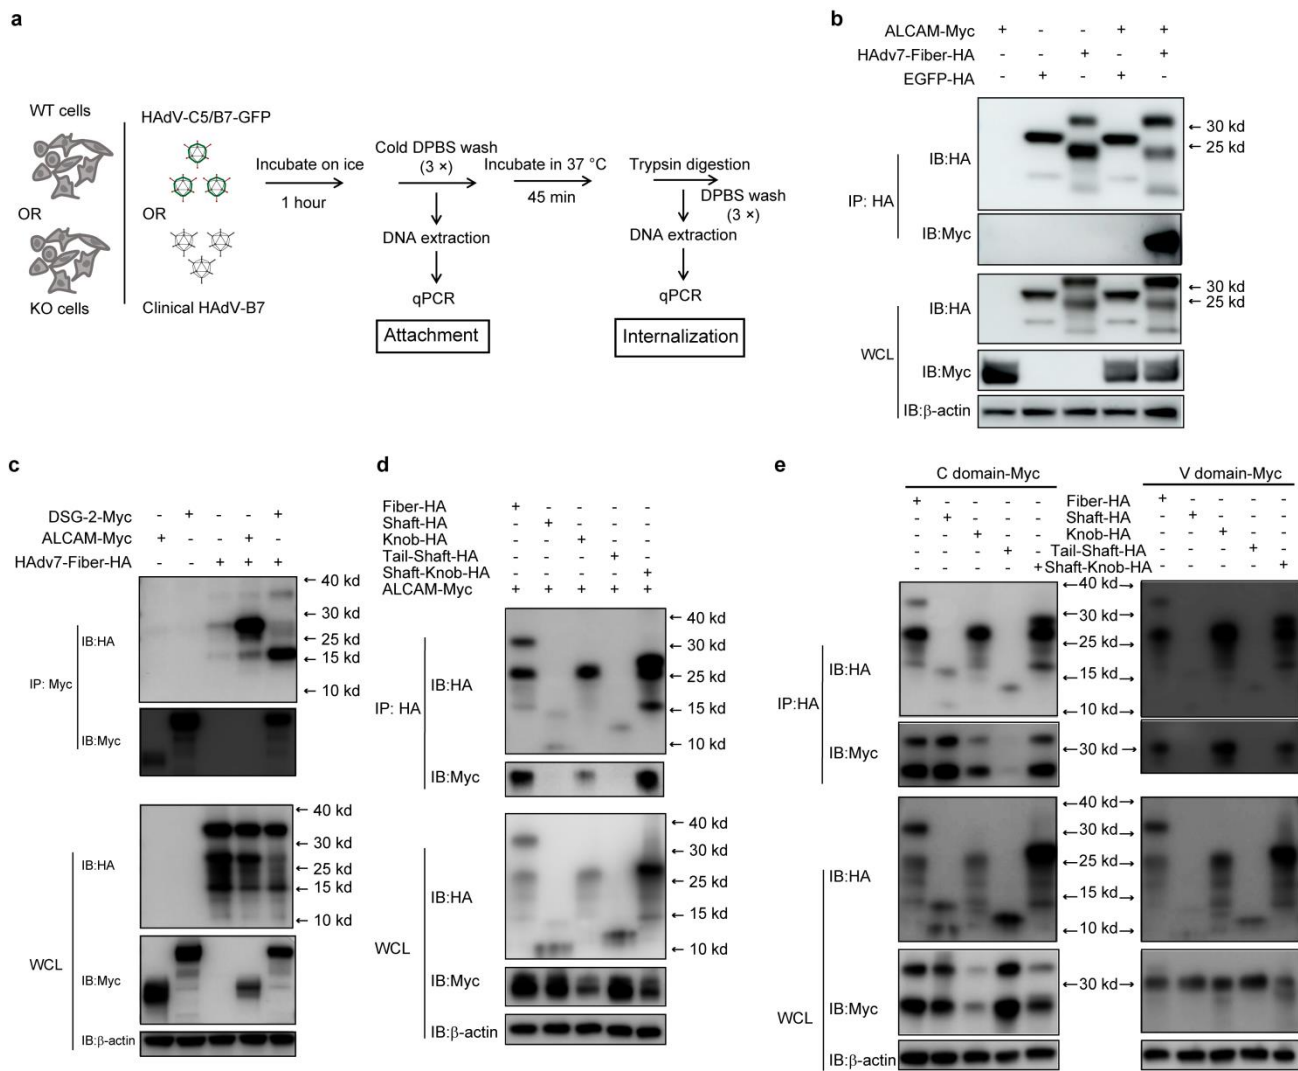

**Supplementary Figure 10 Dissection of the pattern of interaction between ALCAM and HAdV-B fiber proteins in HEK-293T cells (related to Fig. 4).** **a**, Schematic diagram showing the procedure of attachment and internalization assays. **b**, Co-IP analysis of the interactions between ALCAM-myc and HAdV-fiber-HA or EGFP-HA. **c**, Co-IP analysis of the interaction of HAdV7-fiber-HA with ALCAM-myc or DSG-2-myc. **d**, Co-IP analysis of the interaction of ALCAM-myc with different domains of fiber protein, including the full-length fiber-HA, shaft-HA, knob-HA, tail-shaft-HA, or shaft-knob-HA. **e**, Co-IP analysis of the interaction between ALCAM-C-domain-myc or ALCAM-V-domain-myc and HAdV7-fiber-HA, shaft-HA, knob-HA, tail-shaft-HA or shaft-knob-HA. For **d-e**, immunoprecipitation is conducted using anti-HA beads. For **b-e**, WCL, whole cell lysate. All Co-IP analysis is performed with denatured gels. The experiment is repeated three times independently and similar results are obtained. Source data are provided as a Source Data file.

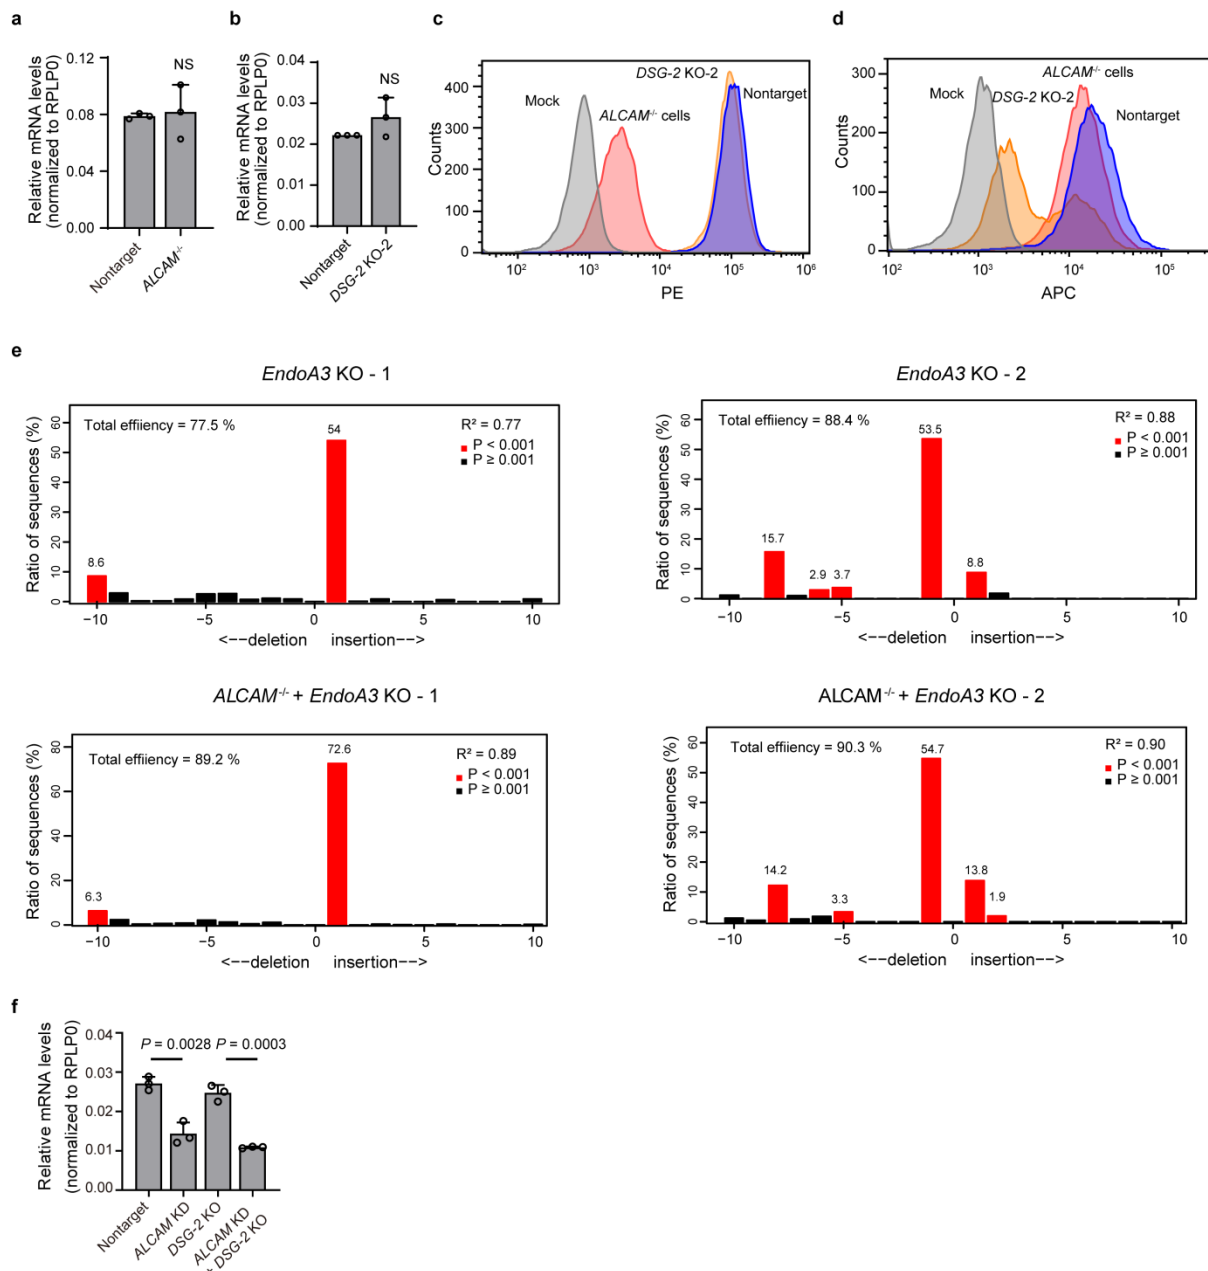

**Supplementary Figure 11 Characterization of gene knockout and knockdown cells.** **a**, RT-qPCR quantification of DSG-2 mRNA expression in non-targeting sgRNA and ALCAM<sup>-/-</sup> HEK-293A cells. **b**, RT-qPCR quantification of ALCAM mRNA expression in non-targeting and DSG-2 knockout cells. **c-d**, Flow cytometry analysis of ALCAM (**c**) and DSG-2 (**d**) protein expression on cell surface. **e**, Evaluation of the knockout efficiencies of EndoA3 sgRNAs in HEK-293A by TIDE analysis of Sanger sequencing results. **f**, RT-qPCR quantification of ALCAM mRNA expression in non-targeting, ALCAM knockdown, DSG-2 knockout, ALCAM knockdown/DSG-2 knockout cells. For **a-b** and **f**, Rplp0 is used as an internal control. Data are presented as mean ± SD ( $n = 3$ ) from three independent biological replicates. The significant difference between non-targeting and knockout groups is analyzed by two-tailed unpaired Student's  $t$  test. Source data are provided as a Source Data file.

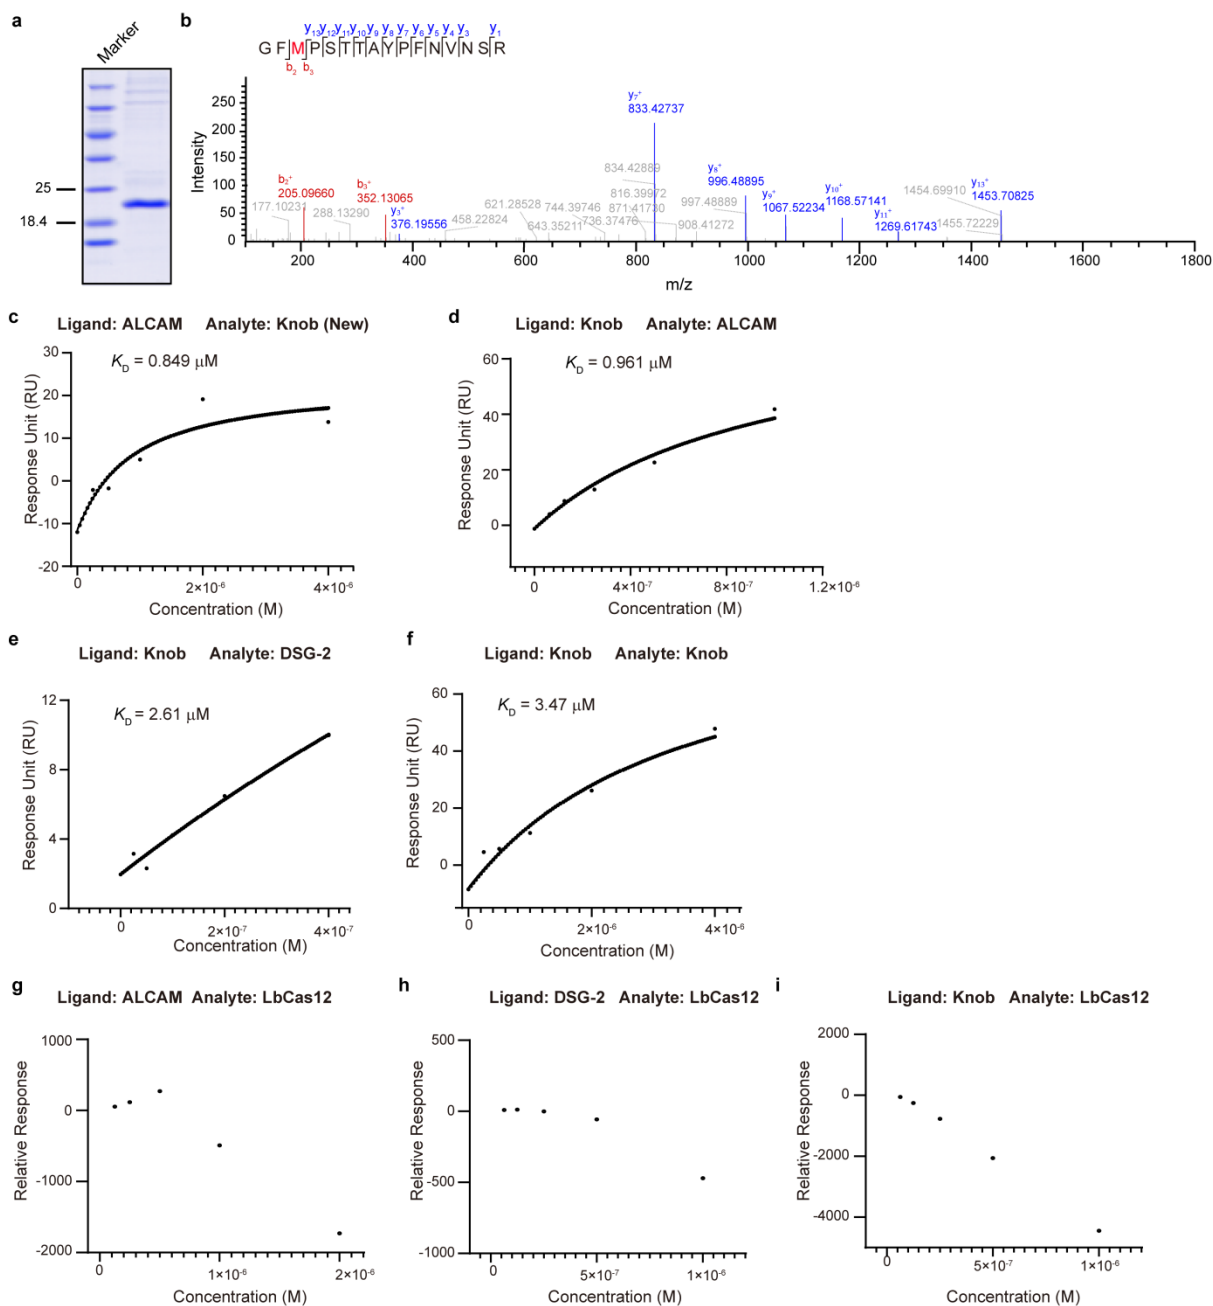

**Supplementary Figure 12. Characterization of the interaction between ALCAM and HAdV-B7 knob domain (related to Fig. 5).** **a**, Expression and purification of His-tagged knob domain from SF9 cells. Arrow dictate target protein band. **b**, Identification of protein sequence of purified knob domain using mass spectrometry. An identified unique peptide of knob domain, GFMPSTTAYPFNVNSR, is shown. **c-f**, Fitted curves for SPR measurements of the interactions between fiber knob and ALCAM or DSG-2. **c**, ALCAM (ligand) and knob (analyte) (biological replicate to Fig. 5c-d). **d**, Knob (ligand) against ALCAM (analyte). **e**, Knob (ligand) against DSG-2 (ligand). **f**, Knob (ligand) against knob (analyte). **g-i**, ALCAM (ligand) (**h**), DSG-2 (ligand) (**i**) or knob (ligand) (**j**) against an irrelevant protein LbCas12 (analyte). Curve-fitting is performed using a steady-state affinity method. Source data are provided as a Source Data file.

## Supplementary Tables

**Supplementary Table 1. Primers for sgRNA NGS analyses**

| <b>Sequences</b> |                                                              |
|------------------|--------------------------------------------------------------|
| NGS-F            | 5'-tcttccctacacgacgctcttccgatctccgtaacttgaaagtattcga-3'      |
| NGS-R            | 5'-gtgactggagttcagacgtgtgctcttccgatctcttttcaagtgataacggac-3' |



**Supplementary Table 2. DNA sequences of substituted shaft-knob in the recombinant HAdV-B**

|                                                                                                                                                                                                                                                                                                                                                                                                                                                                                                                                                                                                                                                                                                                                                                                                                                                                                                            |
|------------------------------------------------------------------------------------------------------------------------------------------------------------------------------------------------------------------------------------------------------------------------------------------------------------------------------------------------------------------------------------------------------------------------------------------------------------------------------------------------------------------------------------------------------------------------------------------------------------------------------------------------------------------------------------------------------------------------------------------------------------------------------------------------------------------------------------------------------------------------------------------------------------|
| <b>HAdV-B3</b><br>aacggggttttaagtcttaaatgtgtaatccacttaccactgcaagcggctcctccaacttaaagtgggaagtggcttacagtagactactgatggatc<br>cttagaagaaaacatcaagtaacaccccctaacaagtaaacaccattctataaattaccaataggaaacgggttgcaaatagaacaaaacaaacttg<br>cagtaagctcggaaatggcttacattgactcttccaattctattgactcaaaaaataacactttatggacaggtccaaaaccagaagccaactgcataattg<br>aatacgggaaaagaaaaccagatagcaaaactaacttfaatcttgtaaaaaatggaggaattgtaatggatgtaacgctaattgggagcctcagactatg<br>ttaacaccttattaaaaacaaaatgtctccattaatgtagaattatactttgatgccactggctatataattaccagacttatcttctttaaacagatctacaact<br>aaaatacaagcaaacactcactttagtgaagaggtttatgccaagtactacagcgtatccattgtccttctaatacggggaacagataatgaaaattata<br>ttttggcaatgctactacaaagcaagcagatggcgcctttttccgttggaggttactgttacgcttaataaacgctgccagatagtcgcacatcctatgttat<br>cactttttatggctcctgaatgctggctagctccagaaactactcaggcaacccctataacctccccatttaccttttctatattacagaagatgactga                      |
| <b>HAdV-B7</b><br>gacggagtcttactttaaaatgttaaccccactaacaaccacagggcgggtctctacagttaaaagtgggaggggggtcttacaatagatgacaccgacgg<br>tttttgaaagaaaacataagtccaccacaccactcgttaagactggcactctatagtttgcgctaggaccggattagaacaaatgaaaacaaactt<br>tgtgcaaatgggagaaggacttacattcaattccaacaacattgcattaatgacaatattaacacccatggacaggagttaacccaccagagccaac<br>tgcaataatggcctccagtgaatctaattgattgcaaatattctaacactagttaaaactggagccctcgtcactgcattgtttatgttataggatctaa<br>cgatttaatatgtaactacacataaaaaataaatttactgcagagctgtttttgattctactgtaattattaactagcctttcatccctaaaaactccactta<br>atcataaatcaggggcaaacatggctactggccttactaatgctaaaggttcatgccagcacaactgcctatccttcaatgtaattccagagaaaa<br>gaaaactacatttacggaactgttactacacagctagtgtacacactgctttccattgacatatctgtcatgcttaaccaagagcattaataatgagaca<br>tcatattgtattcgtgaacttggcctggaatacaggagttgcccagaagtgcaaacctctgctactaccctagtcacctctccattaccttttactacattag<br>agaagacgactga                |
| <b>HAdV-B11</b><br>aacggagtcttactttaaaatgttaaccccactaacaaccacagggcggatctctacagctaaaagtgggagggggacttacagtggatgacaccaacg<br>gtttttgaaagaaaacataagtccaccacaccactcgttaagactggcactctatagtttaccactaggagccggattgggaacgaatgaaaataaac<br>tttgatcaaataggacaaggacttacattcaattcaacaacatttgattgatgacaatattaacaccttatggacaggagtcaccccaccgaagccaa<br>ctgtcaaatcatgaactccagtgaatctaattgattgcaaatattctaacactagttaaaactggagcactagtcactgcattgtttatgttataggagtatcta<br>acaatttaatatgtaactacacacagaatataaatttactgcagagctgttttcgattctactggtaatttactaactagactctcatccctcaaaactccac<br>ttaatcataaatcaggacaaaacatggctactggccttactaatgctaaaggttcatgccagcagcactgcctatccttcaatgataattctagagaa<br>aaagaaaactacatttacggaactgttactacacagctagtgtacacactgctttccattgacatatctgtcatgcttaaccgaagagcaataaatgacga<br>gacatcatattgtattcgtataacttggcctggaacacaggagatgcccagaggtgcaaacctctgctacaaccctagtcacctccccattaccttttact<br>acatcagagaagacgactga |
| <b>HAdV-B14</b><br>gacggagtcttactttaaaatgttaaccccgtaacaaccacagggcgggtctctacagctaaaagtgggagggggacttacagtagatgacactgatgg<br>gacctacaagaaaacataggtccaccacaccactgttaagactggcactctatagtttatccctaggagccggattgggaacagatgaaaataaac<br>ttgtaccaaattgggagaaggacttacattcaattcaacaacatttgattgatgacaatattaacacctgtggacaggagttaacccaccgaagccaa<br>ctgtcaaatgatggactccagtgaatctaattgattgcaaatattctaacactagttaaaactggagccctagtcactgcattgtttatgttataggagtatcta<br>acaatttaatatgtaactacacacagaatataaatttactgcggagctgtttttgattctgcgggtaatttactaactagcctgtcatccctaaaaactccac<br>ttaatcataaatcaggacaaaacatggctactggccttactaatgctaaaaggttcatgccagcacaactgcttatccttcaataataattctagagaaa<br>actacatttacggaacctgtcactacacagctagtgtacacactgctttccattgacatatctgtcatgcttaaccaagagcaataagactgatacatcat<br>attgtattcgtataacttggcctggaacacaggagatgcccagaggggcaaacctctgctacaaccctagttacctccccattaccttttactacatcaga<br>gaagacgactga         |
| <b>HAdV-B35</b><br>gacggagtcttactttaaaatgttaaccccactaacaaccacagggcggatctctacagctaaaagtgggagggggacttacagtggatgacactgatgg<br>tacctacaagaaaacatagctgtctacagcaccattactaaaaataactactctgtagaactatccattggaaatggattagaactcaaaacaataaactat<br>gtgcaaatgggaaatgggttaaaatcaaacgggtgacattgtataaggatagattaacaccttatggactggaataaacctccacctaactgtcaa<br>attgtgaaaacactaatacaaatgatggcaaaccttactttatagtaaaaaatggagggcctgttaatggctacgtgtctctagttggtgtatcagacact                                                                                                                                                                                                                                                                                                                                                                                                                                                             |

gtgaaccaaattgtcacacaaaagacagcaaacatccaattaagattatatttggactcttctggaaatctattaactgaggaatcagacttaaaaattccact  
aaaaataaatcttctacagcgaccagtgaaactgtagccagcagcaaagcctttatgccaaagtactacagcttatccctcaacaccactactagggatagt  
gaaaactacattcatggaatatgttactacatgactagttatgatagaagtctatttccttgaacatttctataatgctaaacagccgtatgatttctccaatgt  
gcctatgccatacaatttgaatggaatctaatgcaagtgaatctccagaaagcaacatagctacgctgaccacatcccccttttctttcttacattacagaa  
gacgacaactaa

### **HAdV-B50**

gacggagtcttactttaaattgttaaccccactaacaaccacagcgggcctttacagttaaaagtgggagggggacttatagtggatgacactgatggg  
accttacaagaaaacatacgtgttacagcaccattactaaaaataatcattctgtagaactatccattggaaatggattagaacacaaaacaataaactat  
gtgccaaattgggaaatgggttaaaatttaacaacggtgacattgtataaaggatagtattaacaccttatggactggaataaagcctccacctaactgtca  
aatagtggaaaacactgatacaaacgatggcaaacttactttagtattagtaaaaaacggaggactgttaatggctacgtatctctagttggtgtatcagaca  
ctgtgaaccaaattgtcacacaaaagtcagcaaccatacaattaagattatattcgactcttctggaaatctattaactgatgaatcaaacttaaaaattccact  
taaaaataaatcttctacagcaaccagtgaagctgcaaccagcagcaaaagcctttatgccaaagtactacagcttatcccttaacaccactactagggatagt  
gaaaactatattcatggaatatgttactatagactagttatgatagaagtctagttcccttaaacatttctataatgctaaacagccgtacgatttctccaatgt  
gcctatgccatacaatttgaatggaatctaatgcaaaagaatctccagaaagcaacatagctacgctgaccacatcccccttttctttcttattagagaa  
gacgacaactaa

**Supplementary Table 3. Primers for construction of sgRNA plasmid**

| <b>Genes</b>    | <b>Forward primers</b>    | <b>Reverse primers</b>     |
|-----------------|---------------------------|----------------------------|
| Nontarget sgRNA | caccgacggaggctaagcgtegcaa | aaacttgcgacgcttagcctccgtc  |
| <i>CADMI-1</i>  | caccggatgctgaaggtgcacaagg | aaacccttgtgcacettcagcatcc  |
| <i>CADMI-2</i>  | caccggatgctgaaggtgcacaagg | aaacccttgtgcacettcagcatcc  |
| <i>ALCAM-1</i>  | caccgtgtgtgcatgctagtaactg | aaaccagttagctagcatgcacacac |
| <i>ALCAM-2</i>  | caccggattctgaggtacgtcaagt | aaacacttgacgtacctcagaatcc  |
| <i>DSG-2-1</i>  | caccgtagagctaccagtttacag  | aaacctgtaaactgggtagctctac  |
| <i>DSG-2-2</i>  | caccgtagagctaccagtttacag  | aaacctgtaaactgggtagctctac  |
| <i>CAR-1</i>    | caccgtacgcttagtcccgaagacc | aaacggcttctcgggactaagcgtac |
| <i>CAR-2</i>    | caccgacgcttagtcccgaagacca | aaactggttctcgggactaagcgtc  |
| <i>EndoA3-1</i> | caccgaaatacgggaaggagctcg  | aaaccgagctcctcccgtatttcc   |
| <i>EndoA3-2</i> | caccgacactgtgtcgaagatccga | aaactcggatcttcgacacagtgtc  |

**Supplementary Table 4. Primers for PCR amplification of sgRNA targeted sites for Sanger sequencing****analyses**

| <b>Genes</b>     | <b>Forward primers</b> | <b>Reverse primers</b> |
|------------------|------------------------|------------------------|
| <i>CADM1-1/2</i> | atggcgagtgtagtgtctgc   | gatcactgtcacgtctttcgt  |
| <i>ALCAM-1</i>   | cctgccgtgatggttatctga  | tagttcctcactgcaaatctct |
| <i>ALCAM-2</i>   | agatgacaaccttcacgaca   | ccctccatttcagaccact    |
| <i>DSG-2-1</i>   | agctgagactgtttgggctt   | catgtctctggaagccctg    |
| <i>DSG-2-2</i>   | tcctccatcctectgactc    | gagctcatccctaccaagcc   |
| <i>CAR-1/2</i>   | ggactccattcctcgggacc   | gtctcaacgtcatgcctgct   |
| <i>EndoA3-1</i>  | acttagcaccaccttggtaa   | gctccaataaatgcaggagctt |
| <i>EndoA3-2</i>  | acttagcaccaccttggtaa   | gctccaataaatgcaggagctt |

**Supplementary Table 5. Primers for qPCR**

| <b>Genes</b>                           | <b>Forward primers</b>   | <b>Reverse primers</b> |
|----------------------------------------|--------------------------|------------------------|
| <i>β-actin</i> (human)                 | gtctgccttggtagtgataatg   | tcgaggacgccctatcatgg   |
| <i>RPLP0</i> (human)                   | agcccagaacactgggtctc     | actcaggatttcaatgggtgcc |
| <i>RPLP0</i> (hamster)                 | agtgccacactctatcatca     | gggcagcagccacaaa       |
| <i>EGFP</i>                            | gaagaacggcatcaaggt       | gctcaggtagtggtgtgc     |
| HAdV-C5-L3                             | acgatgacaacgaagacgaagtag | ggcgcctgcccaatac       |
| HAdV-C5-L5                             | taatgtagcaggaggactaag    | atcaagtataaggcgtctgt   |
| HAdV-B7-L3                             | gcaatggctgttatgtgcct     | gcaggaccatgttcacatcc   |
| HAdV-B7-L5                             | caggcgggtctctacagtta     | gggtcctagcgacaaaccta   |
| HAdV-B3-L3                             | tacaacgtggcacaatgcaa     | aggtgacggctttgtagtca   |
| HAdV-B14-L5                            | agcccagacggagttcttac     | ccggctcctagggataaacc   |
| HAdV-B35-L5                            | atgaaagcacctcccaacac     | agatccgcctgtggttgta    |
| <i>DSG-2</i>                           | ctaacaggttacgctttggatgc  | gtgaacactggttcgttgcat  |
| <i>ALCAM</i>                           | tctgcccgtctgctcttct      | ttctgaggtacgtcaagtcgg  |
| <i>ALCAM</i><br>(Codon optimized)      | agcacctggagtacaagac      | ctccttgatggcgttcttgg   |
| <i>ALCAM</i> (hamster)                 | atcgagcccatccttttcta     | gtgtcagtgactcccttttc   |
| <i>ALCAM</i> (hamster Codon optimized) | ctgagcctgagcgagaacta     | acgaatctcttctcgtcgt    |

**Supplementary Table 6. siRNA sequences**

| <b>Genes</b>          | <b>Sense sequences (5'-3')</b> | <b>Anti-sense sequences (5'-3')</b> |
|-----------------------|--------------------------------|-------------------------------------|
| Nontarget             | uucuccgaacgugucacgutt          | acgugacacguucggagaatt               |
| <i>ALCAM</i> -siRNA-1 | gccuucagauccucuacaatt          | uuguagaggaucaagaaggctt              |
| <i>ALCAM</i> -siRNA-2 | ccaaggcugacauacaaaatt          | auuuguaugucagccuuggtt               |
| <i>ALCAM</i> -siRNA-3 | cucgguaauauccaagaatt           | uuucuuggauuuaccgagtt                |

**Supplementary Table 7. Human codon-optimized *ALCAM* genes for overexpression experiments**

|                                                                                                                                                                                                                                                                                                                                                                                                                                                                                                                                                                                                                                                                                                                                                                                                                                                                                                                                                                                                                                                                                                                                                                                                                                                                                                                                                                                                                                                                                                                                                                                                                                                                                                                                                                                                                                                                                                                                                                                      |
|--------------------------------------------------------------------------------------------------------------------------------------------------------------------------------------------------------------------------------------------------------------------------------------------------------------------------------------------------------------------------------------------------------------------------------------------------------------------------------------------------------------------------------------------------------------------------------------------------------------------------------------------------------------------------------------------------------------------------------------------------------------------------------------------------------------------------------------------------------------------------------------------------------------------------------------------------------------------------------------------------------------------------------------------------------------------------------------------------------------------------------------------------------------------------------------------------------------------------------------------------------------------------------------------------------------------------------------------------------------------------------------------------------------------------------------------------------------------------------------------------------------------------------------------------------------------------------------------------------------------------------------------------------------------------------------------------------------------------------------------------------------------------------------------------------------------------------------------------------------------------------------------------------------------------------------------------------------------------------------|
| <b><i>ALCAM-myc-flag</i></b><br>atggagagcaagggcgctagcagctgcagactgctgttctgcctgctgatcagcggcaccgtgtcagaccggcctgggctggtacaccgtgaattcc<br>gcctacggcgacaccatcattatcccctgcagactggacgtgcctcagaacctgatgttcggcaagtggaaagtagagaagcccacggcagccccgt<br>gttcacgcctcagaagcagcacaagaagagcgtgcagtacgacgacgtgccgagtacaaggacagactgaacctgagcgagaactacacctg<br>agcatcagcaacgctagaatcagcgcgatgagaagagattcgtatgtatgctcgtcacagaagacaacgtgttcgagggccccaccatcgtgaagggtttca<br>agcagcctagcaagcccagatcgtgagcaaggccctgttcttgagaccgagcagctgaagaagctggggcactgcatcagcgaggacagctacc<br>ccgacggcaacatcacctggtacagaaacggcaaggtgctgacccccctggagggcgccgtggtgatcatcttcaagaaggagatggacccccgtgac<br>acagctgtacaccatgacaagcacctggagtacaagaccaccaaggccgacattcagatgcccttcacctgcagcgtgacctactacggccctagcg<br>ggcagaagaccatccacagcgagcaagcgtgttcgacatctactaccccaccgagcaagtgacctccaagtgtgcccccaagaacgccatcaa<br>ggagggcgacaacatcacctgaagtgcctgggcaacggcaacccccctcccagaggagttctgttctacctgcccgggcagcccaggggcatccgg<br>agcagcaaacctacacctgaccgacgtgagaagaaacgctaccggcgattacaagtgcagcctgatcacaagaagagcagatgctagcaccg<br>ccatcacctgacactacctggacctgagcctgaacctagcggcgaggtgacaagacagatcggcgacgccctgcccgtgagctgaccatcagcgc<br>gagtagaaacgccaccgtagtgtggatgaaggacaacatcagactgagaagcagccctagcttcagcagcctgactaccaagacgccggcaactac<br>gtgtgagagaccgacctgcaagaggtggagggcctgaagaagagagagacctgacctgatcgtggagggcaagcctcagatcaagatgaccaag<br>aagaccgacctagcggcctgagcaagaccatcatctgccacgtggagggcttcccaagcccgcattcagtgaccatcaccggcagcggcagcg<br>tgatcaatcagaccgaggagagcccctacatcaacggcagatactacagcaagatcattatcagccccgaggagaacgtgacctgacctgaccgcc<br>gagaatcagctggagagaaccgtgaacagcctgaacgtgagcggcatcagatccccgagcagcagaggccgacgagatcagcgacgaaaatag<br>agagaaggtgaacgaccaagccaagctgatcgtggcctcgtggtggcctgctcctggccgcccgtggtggcggcgtggtgactggctgacatga<br>agaagagcaagaccgctagcaagcagcgtgaacaaggacctgggcaacatggaggagaacaagaagctggaggagaataatcacaagaccgagggc<br>cacggcggccggagcagaaactcatctcagaagaggatctggcagcaaatgatatcctggattacaaggatgacgacgataaggtttaa |
| <b><i>ALCAM C domain-myc-flag</i></b><br>atgtactaccccaccgagcaagtgacctccaagtgtgcccccaagaacgccatcaaggagggcgacaacatcacctgaagtgcctgggcaacg<br>gcaacccccctcccagaggagttctgttctacctgcccgggcagcccaggggcatccggagcagcaaacctacacctgaccgacgtgagaagaaa<br>cgctaccggcgattacaagtgcagcctgatcacaagaagagcagatgatcgtagcaccgccatcacctgacactacctggacctgagcctgaacctag<br>cggcgaggtgacaagacagatcggcgacgccctgcccgtgagctgaccatcagcgcgagtagaaacgccaccgtagtgtggatgaaggacaacat<br>cagactgagaagcagccctagcttcagcagcctgactaccaagacgccggcaactacgtgtgagagaccgcccgtcaagaggtggagggcctgaa<br>gaagagagagagcctgacctgatcgtggagggcaagcctcagatcaagatgaccaagaagaccgacctagcggcctgagcaagaccatcatctgc<br>cacgtggagggcttcccaagcccgcattcagtgaccatcaccggcagcggcagcgtgatcaatcagaccgaggagagcccctacatcaacggca<br>gatactacagcaagatcattatcagccccgaggagaacgtgacctgacctgaccgccgagaatcagctggagagaacctgaacagcctgaacgtg<br>agccatattgagcagaaactcatctcagaagaggatctggcagcaaatgatatcctggattacaaggatgacgacgataaggtttaa                                                                                                                                                                                                                                                                                                                                                                                                                                                                                                                                                                                                                                                                                                                                                                                                                                                                                                                                                                                                                             |
| <b><i>ALCAM V domain-myc-flag</i></b><br>atggagagcaagggcgctagcagctgcagactgctgttctgcctgctgatcagcggcaccgtgtcagaccggcctgggctggtacaccgtgaattcc<br>gcctacggcgacaccatcattatcccctgcagactggacgtgcctcagaacctgatgttcggcaagtggaaagtagagaagcccacggcagccccgt<br>gttcacgcctcagaagcagcacaagaagagcgtgcagtacgacgacgtgccgagtacaaggacagactgaacctgagcgagaactacacctg<br>agcatcagcaacgctagaatcagcgcgatgagaagagattcgtatgtatgctcgtcacagaagacaacgtgttcgagggccccaccatcgtgaagggtttca<br>agcagcctagcaagcccagatcgtgagcaaggccctgttcttgagaccgagcagctgaagaagctggggcactgcatcagcgaggacagctacc<br>ccgacggcaacatcacctggtacagaaacggcaaggtgctgacccccctggagggcgccgtggtgatcatcttcaagaaggagatggacccccgtgac<br>acagctgtacaccatgacaagcacctggagtacaagaccaccaaggccgacattcagatgcccttcacctgcagcgtgacctactacggccctagcg<br>ggcagaagaccatccacagccatattggagcagaaactcatctcagaagaggatctggcagcaaatgatatcctggattacaaggatgacgacgataag<br>gtttaa                                                                                                                                                                                                                                                                                                                                                                                                                                                                                                                                                                                                                                                                                                                                                                                                                                                                                                                                                                                                                                                                                              |

**Supplementary Table 8. Human codon-optimized hamster *ALCAM* gene for overexpression experiments**

**Hamster *ALCAM*-myc-flag**

atggccccaaggtgagccctagctgcagactggtgttctgcctgctgatcagcgcggccgtgctgagacccggcctggcctggtacaccgtcaatagc  
gcctacggcgacaccatcgtgatgccctgcagactggacgtgcctcagaacctgatgttcggcaagtggaaagtacgagaagcccgacggcagccccg  
tgttcacgccttcagaagcagcacaanaaagagcgtgcagtacgacgacgtgcccagtagacaaggacagactgagcctgagcagaactacaccctg  
agcatcaaacacccaagatcagcgcagagaagagattcgtgtcatgctggtgaccgaggacaacgtgttcgaggccccaccctggtgaaggtgtt  
caagcagcctagcaagcccagatcgtgaacaaggccccctacctggagaccgagcagctgaagaagctgggcgactgcatcagcagagacagcta  
ccccgacggcaacatcacctggtacagaaacggcaaggtgctgcagccccctggtgggcgaggtggacatcctgttcaagaaagaggtggaccccgtg  
acacagctgtacaccatgacaagcagcctggagtacaagaccaccaaggccgacattcagatgcccttcacctgcagcgtgacctactacggccctagc  
gggcagaagaccatccacagcgcagcagaccgtgttcgacatctactaccccaccgagcaagtgaccatccaagtgtgcccccaagaacgccatca  
aggaggggcgacaacatcacctgcagtgcctgggcaacggcaacccccctcccaggaggttcatgtttacctgcccgggcagcccgaggcatccg  
gagcagcaaacctacaccctgaccgacgtgagacggaacgctaccggcgactacaagtgcagcctgatcgacaagaagagcatgatcgtgtagcacc  
accatcacctgacactacctggacctgagcctgaaccctagcggcgaggtgaccaagcagatcggcgacgccctgcccgtgagctgcaccatcagcg  
ctagcagaaacgccaccgtggtctggatgaaggacaacatcagactgagaagcagccctagcttcagcagcctgcaactaccaagacgccggcaacta  
cgtgtgagagaccgccctgcaagaggtggagggcctgaagaagagagagagcctgaccctgatcgtggagggcaagcctcagatcaagatgaccaa  
gaagaccgaccctagcggcctgagcaagaccatcatctgccacgtggagggcctcccccaagcccgccattcagtgaccatcaccggcagcggcagc  
gtgatcaatcagaccgaggagagcccctacatcaacggcagatactacagcaagatcattatcagccccgaggagaacgtgaccctgacctgcccgc  
cgagaatcagctggagagaaccgtgaacagcctgaacgtgagcgaacgagaacagagagaaggtgaacgaccaagccaagctgatcgtgggca  
tcgtggtgggcctgctcctggccgccctggtggccggcgtggtgtactggctgtacatgaagaagagcaagaccgctagcaagcacgtgaacaaggac  
ctgggcaacatggaggagaacaaaagctggaggagaataatcacaagaccgaggccacgcggccggagcagaactcatctcagaagaggatctg  
gcagcaaatgatctcctggattacaaggatgacgacgataaggtttaa



**Supplementary Table 9. Human codon-optimized HAdV-B7 fiber genes**

|                                                                                                                                                                                                                                                                                                                                                                                                                                                                                                                                                                                                                                                                                                                                                                                                                                                                                                                                                                                                                                                             |
|-------------------------------------------------------------------------------------------------------------------------------------------------------------------------------------------------------------------------------------------------------------------------------------------------------------------------------------------------------------------------------------------------------------------------------------------------------------------------------------------------------------------------------------------------------------------------------------------------------------------------------------------------------------------------------------------------------------------------------------------------------------------------------------------------------------------------------------------------------------------------------------------------------------------------------------------------------------------------------------------------------------------------------------------------------------|
| <b>Fiber-HA</b>                                                                                                                                                                                                                                                                                                                                                                                                                                                                                                                                                                                                                                                                                                                                                                                                                                                                                                                                                                                                                                             |
| atgaccaagcgggtgcggtgtctgatagcttcaatcctgtgtaccctacgaggacgagtctacctccaacaccctttatcaaccctggattcatcagc<br>cccaacggctttacacagagccctgatggcgtgctgacctgaagtgcctgacacctctgaccacaaccggcggcagcctgcagctgaaagtgggagg<br>cggactgaccatcgatgacaccgacggcttctcaaggaaaacattagcggcagacccccactggtgaaaaccggccacagcatcggcctgtctctcg<br>gccctggcctggaaccaatgagaacaagctgtgcgccaagctgggcgaaggctgacattcaacagcaacaacatctgcatcaacgacaacattaac<br>aactgtggaccggagttaatcccaccagagccaactgccagatcatggcttctccgagagcaatgactgcaagctgatcctgacactggtaagaccg<br>gcgactggtgaccgcttttgtgtacgtgatcggcgtgtccaacgacttcaacatgctgacgaccataagaacatcaacttaccgccgagctgttctcg<br>actctacaggcaacctgctgaccagcctgagcagcctgaagacacctctgaatcacaaaagcggacagaacatggccacaggcgcctgaccaacgc<br>caagggttcatgctagcaccacagcctatcctttaatgtgaacagcagagaaaaggaaaactacatctacggcactgttactacaccgccagcgac<br>cacacagcctccccatgacatcagcgtgatgctgaaccagagagccctgaacaacgagacaagctactgtatccgcgtgacatggtcctggaacacc<br>ggcgtggcccctgaggtgcagaccagtgtaccacctggtcacatctccattcaccttctactacatcagagaggtgattatccttacgacgtgctgac<br>tacgcctga |
| <b>Knob-HA</b>                                                                                                                                                                                                                                                                                                                                                                                                                                                                                                                                                                                                                                                                                                                                                                                                                                                                                                                                                                                                                                              |
| atgctgtggaccggagttaatcccaccagagccaactgccagatcatggcttctccgagagcaatgactgcaagctgatcctgacactggtaagaccg<br>gcgactggtgaccgcttttgtgtacgtgatcggcgtgtccaacgacttcaacatgctgacgaccataagaacatcaacttaccgccgagctgttctcg<br>actctacaggcaacctgctgaccagcctgagcagcctgaagacacctctgaatcacaaaagcggacagaacatggccacaggcgcctgaccaacgc<br>caagggttcatgctagcaccacagcctatcctttaatgtgaacagcagagaaaaggaaaactacatctacggcactgttactacaccgccagcgac<br>cacacagcctccccatgacatcagcgtgatgctgaaccagagagccctgaacaacgagacaagctactgtatccgcgtgacatggtcctggaacacc<br>ggcgtggcccctgaggtgcagaccagtgtaccacctggtcacatctccattcaccttctactacatcagagaggtgattatccttacgacgtgctgac<br>tacgcctga                                                                                                                                                                                                                                                                                                                                                                                                                    |
| <b>Shaft-HA</b>                                                                                                                                                                                                                                                                                                                                                                                                                                                                                                                                                                                                                                                                                                                                                                                                                                                                                                                                                                                                                                             |
| atggatggcgtgctgacctgaagtgcctgacacctctgaccacaaccggcggcagcctgcagctgaaagtgggaggcggactgaccatcgatgaca<br>ccgacggcttctcaaggaaaacattagcggcagacccccactggtgaaaaccggccacagcatcggcctgtctctcggccctggcctggaaccaat<br>gagaacaagctgtgcgccaagctgggcgaaggctgacattcaacagcaacaacatctgcatcaacgacaacattaacacatccttacgacgtgctg<br>actacgcctga                                                                                                                                                                                                                                                                                                                                                                                                                                                                                                                                                                                                                                                                                                                                     |
| <b>Shaft-Knob-HA</b>                                                                                                                                                                                                                                                                                                                                                                                                                                                                                                                                                                                                                                                                                                                                                                                                                                                                                                                                                                                                                                        |
| atggatggcgtgctgacctgaagtgcctgacacctctgaccacaaccggcggcagcctgcagctgaaagtgggaggcggactgaccatcgatgaca<br>ccgacggcttctcaaggaaaacattagcggcagacccccactggtgaaaaccggccacagcatcggcctgtctctcggccctggcctggaaccaat<br>gagaacaagctgtgcgccaagctgggcgaaggctgacattcaacagcaacaacatctgcatcaacgacaacattaacacactgtggaccggagttaat<br>cccaccagagccaactgccagatcatggcttctccgagagcaatgactgcaagctgatcctgacactggtaagaccggcgcactggtgaccgctttg<br>tgtactgatcggcgtgtccaacgacttcaacatgctgacgaccataagaacatcaacttaccgccgagctgttcttcgactctacaggcaacctgctga<br>ccagcctgagcagcctgaagacacctctgaatcacaaaagcggacagaacatggccacaggcgcctgaccaacgccaagggttcatgcttagcac<br>cacagcctatcctttaatgtgaacagcagagaaaaggaaaactacatctacggcactgttactacaccgccagcgaccacacagcctccccatcgc<br>atcagcgtgatgctgaaccagagagccctgaacaacgagacaagctactgtatccgcgtgacatggtcctggaacaccggcgtggcccctgaggtgca<br>gaccagtgtaccacctggtcacatctccattcaccttctactacatcagagaggtgattatccttacgacgtgctgactacgcctga                                                                                                                              |
| <b>HA-Tail-Shaft</b>                                                                                                                                                                                                                                                                                                                                                                                                                                                                                                                                                                                                                                                                                                                                                                                                                                                                                                                                                                                                                                        |
| atgtatccttacgacgtgctgactacgccaccaagcgggtgcggtgtctgatagcttcaatcctgtgtaccctacgaggacgagtctacctccaaca<br>ccccctttatcaacctggattcatcagccccacggctttacacagagccctgatggcgtgctgacctgaagtgcctgacacctctgaccacaaccggc<br>ggcagcctgcagctgaaagtgggaggcggactgaccatcgatgacaccgacggcttctcaaggaaaacattagcggcagacccccactggtgaaa<br>ccggccacagcatcggcctgtctctcggccctggcctggaaccaatgagaacaagctgtgcgccaagctgggcgaaggctgacattcaacagcaac<br>aacatctgcatcaacgacaacattaacacatga                                                                                                                                                                                                                                                                                                                                                                                                                                                                                                                                                                                                         |

**Supplementary Table 10. Insect codon-optimized HAdV-B7 fiber knob genes**

**His-Knob**

atgcaccaccaccaccatcaccaccaccaccacctggaagtctgttccagggtccctgtggactggtgtgaaccctaccagggctaactgccagatc  
atggcttccagcagtgccaacgactgcaagctgacctgactctggtgaagaccggcgctctggtcaccgcttcgtctacgtgatcggcgtcagcaacg  
acttcaacatgctgaccactcacaagaacatcaacttcaactgctgaactgttcttcgactccactggcaacctgctgacttccctgtccagcctgaagactcc  
cctgaaccacaagagcggccagaacatggccaccgggtgcttggactaacgtaagggttcatgcctagcactactgcctacccttcaacgtgaacagc  
cgcgaaaaggagaactacatctacggcacctgctactacactgcctccgaccacaccgcttcccaatcgatatcagcgtgatgctgaaccagcgcgcc  
ctgaacaacgaaaccagctactgcatccgtgtcacctggagctggaacaccggcggtgctctgaggtccagacttccgctaccaccctggtgactagcc  
ctttcaccttctactacatccgtgaggacgactaa
