# Supplementary material for: ALCAM is an entry factor for severe community acquired Pneumonia-associated Human adenovirus species B
Source: PubMed Central journal article supplement — Nat Commun. 2024 Dec 30;15:10889. doi: 10.1038/s41467-024-55261-3 (PMC11686370; doi:10.1038/s41467-024-55261-3), 2024-12-30
Supplement: 41467_2024_55261_MOESM3_ESM.pdf [file 41467_2024_55261_MOESM3_ESM.pdf]

File Name: Supplementary Data 1

Description: Design of sgRNAs in surfaceome CRISPR library v2.0. The gene IDs, sgRNA sequences and positions of the sgRNA-targeting sites in the chromosomes are shown.

File Name: Supplementary Data 2

Description: MaGeCK analyses of sgRNA enrichment in screening with SfCRISPR-v1.0. The ranks, scores and numbers of enriched sgRNAs are shown.

File Name: Supplementary Data 3

Description: MaGeCK analyses of sgRNA enrichment in screening with SfCRISPR-v2.0. The ranks, scores and numbers of enriched sgRNAs are shown.
